# Supplementary material for: Mapping oxygen concentration in the awake mouse brain
Source: eLife journal article supplement (doi:10.7554/elife.12024), 2016-02-02
Supplement: figures [file elife-12024-figures-v2.pdf]

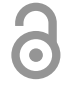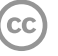

---

## Figures and figure supplements

Mapping oxygen concentration in the awake mouse brain

**Declan G Lyons et al**

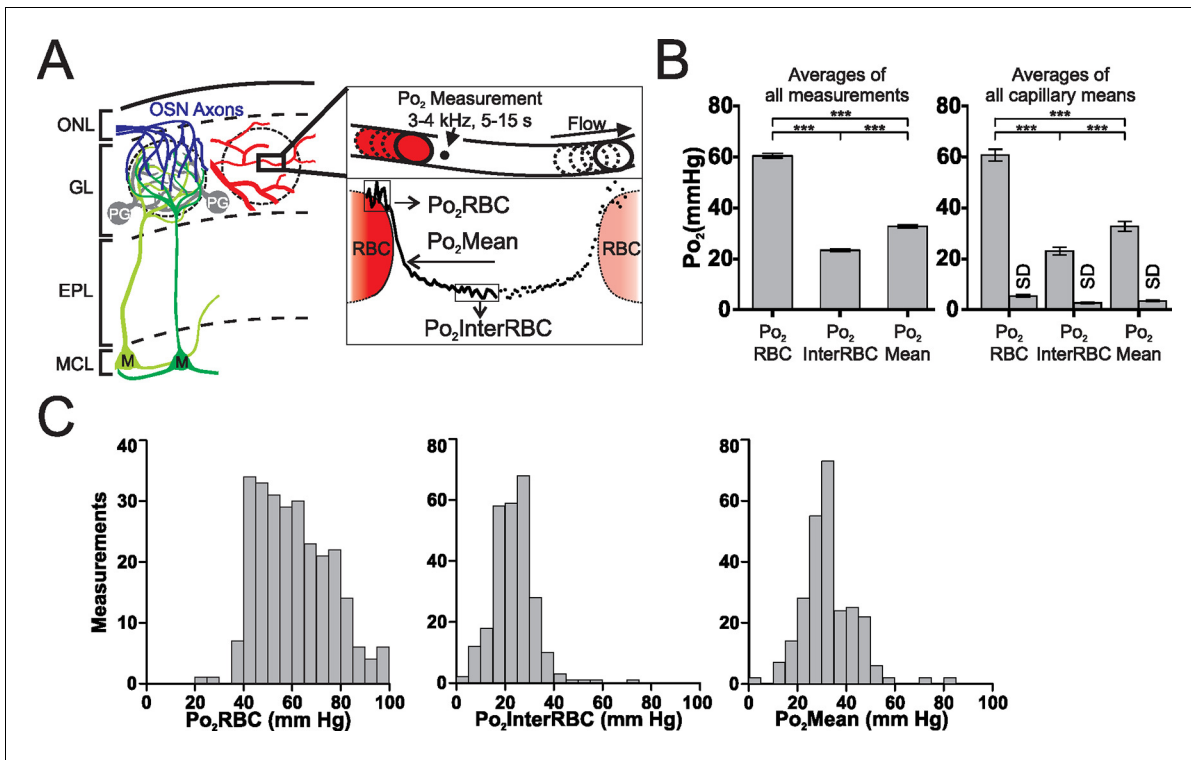

**Figure 1.** Erythrocyte-associated transients (EATs) in the olfactory bulb glomerular layer of the awake mouse. (A) Left panel, schematic diagram of the organisation of the olfactory bulb. OSN: olfactory sensory neuron, PG: periglomerular neuron, M: mitral cell, ONL: olfactory nerve layer, GL: glomerular layer, EPL: external plexiform layer, MCL: mitral cell layer. Right panel, top, schematic illustrating the 2PLM  $Po_2$  measurement procedure in capillaries. Bottom, diagram showing  $Po_2$  values extracted from EATs. The continuous trace represents the  $Po_2$  profile relative to the RBC border in one selected capillary:  $Po_2$  at the RBC border ( $Po_2RBC$ , in this case 47.2 mm Hg),  $Po_2$  at distance from a RBC ( $Po_2InterRBC$ , in this case 8.6 mm Hg) which gives an estimate of  $Po_2$  in the interstitium of the glomerular layer, and average  $Po_2$  in the capillary ( $Po_2Mean$ , in this case 19 mm Hg). (B) Multiple (~4–8) measurements were made in each capillary. The  $Po_2InterRBC$  is significantly lower than both  $Po_2Mean$  and  $Po_2RBC$ , whether calculated on all measurements (the mean value is the average of all measurements pooled from all capillaries assessed,  $n = 262$ , left panel), or on the mean values from each capillary (the mean value is the average of the single mean values for each of the capillaries,  $n=38$ , right panel). SD (the average of the SD values for each capillary, presented as mean standard deviation  $\pm$  SEM) illustrates the fluctuations of  $Po_2$  values in each capillary across the multiple measurements. Data presented as mean  $\pm$  SEM. \* $p < 0.05$ , \*\*\* $p < 0.001$ , Kruskal-Wallis test with 2-tailed Dunn’s multiple comparison post-hoc test. (C) Frequency distributions of all measurements of  $Po_2RBC$  (left panel),  $Po_2InterRBC$  (middle panel), and  $Po_2Mean$  (right panel). 5 mm Hg bin width. For all plots  $n = 5$  mice.

DOI: [10.7554/eLife.12024.003](https://doi.org/10.7554/eLife.12024.003)

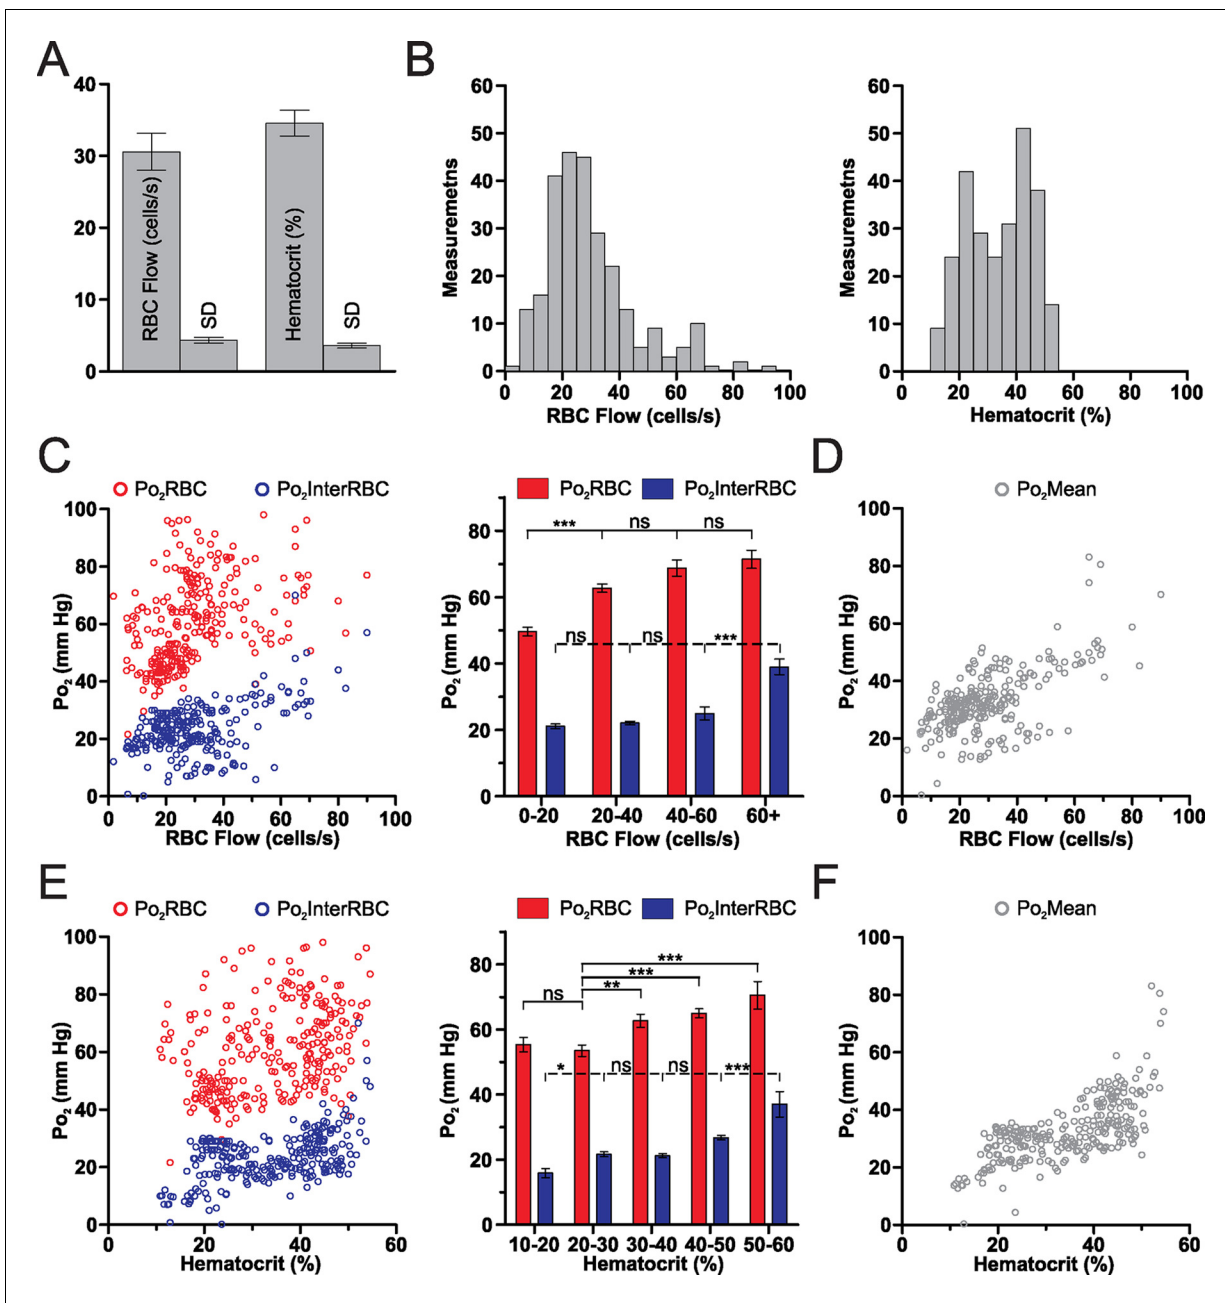

**Figure 2.** Relationships of capillary blood flow and hematocrit to  $Po_2$  values, in the olfactory bulb glomerular layer of the awake mouse. (A) RBC flow and hematocrit calculated from the mean values of each capillary ( $n = 38$ ). SD (the average of the SD values for each capillary, presented as mean standard deviation  $\pm$  SEM) illustrates the fluctuations of RBC flow and hematocrit in each capillary. (B) Frequency distributions of RBC flow and hematocrit (5% bin). (C) Distribution of all  $Po_2$ RBC and  $Po_2$ InterRBC measurements as a function of RBC flow. Note that the  $Po_2$ InterRBC is independent of RBC flow below 60 cells/s while  $Po_2$ RBC increases with RBC flow below 40 cells/s. (D)  $Po_2$ Mean as a function of RBC flow. (E) Distribution of  $Po_2$ RBC and  $Po_2$ InterRBC as a function of hematocrit.  $Po_2$ InterRBC is independent of hematocrit from 20 to 50%.  $Po_2$ RBC increases with hematocrit at low values. (F)  $Po_2$ Mean as a function of hematocrit. Bar graph data presented as mean  $\pm$  SEM. \* $p < 0.05$ , \*\* $p < 0.01$ , \*\*\* $p < 0.001$ . Kruskal-Wallis test with 2-tailed Dunn's multiple comparison post-hoc test. For all plots  $n = 5$  mice.

DOI: 10.7554/eLife.12024.004

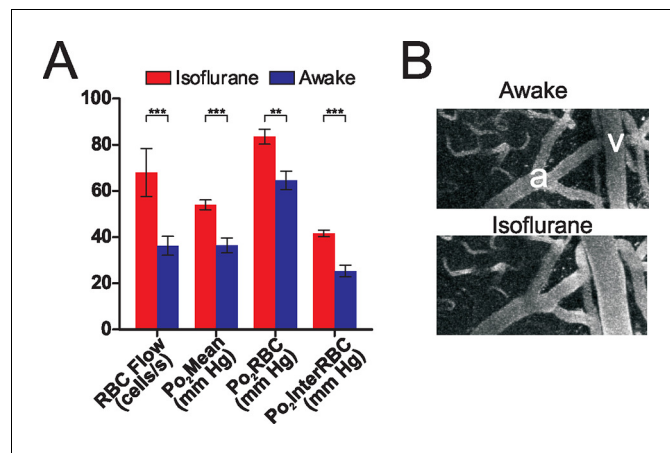

**Figure 3.** Isoflurane changes the brain oxygenation state.  $P_{O_2}$  and RBC flow were compared in the same sets of olfactory bulb glomerular layer capillaries when the animal was awake, and when the animal was anesthetized with isoflurane (0.75%, delivered in air, no oxygen added). (A) Isoflurane anesthesia increased all RBC flow and  $P_{O_2}$  values as compared to the awake state ( $n = 142$  measurements in each condition, 16 capillaries from 3 mice). Bar graph data presented as mean  $\pm$  SEM, \*\*\* $p < 0.001$ , paired 2-tailed Wilcoxon signed rank test. (B) Isoflurane anesthesia induced a large dilation of pial vessels (a: artery, v: vein). See also **Figure 3—figure supplement 1**. DOI: [10.7554/eLife.12024.005](https://doi.org/10.7554/eLife.12024.005)

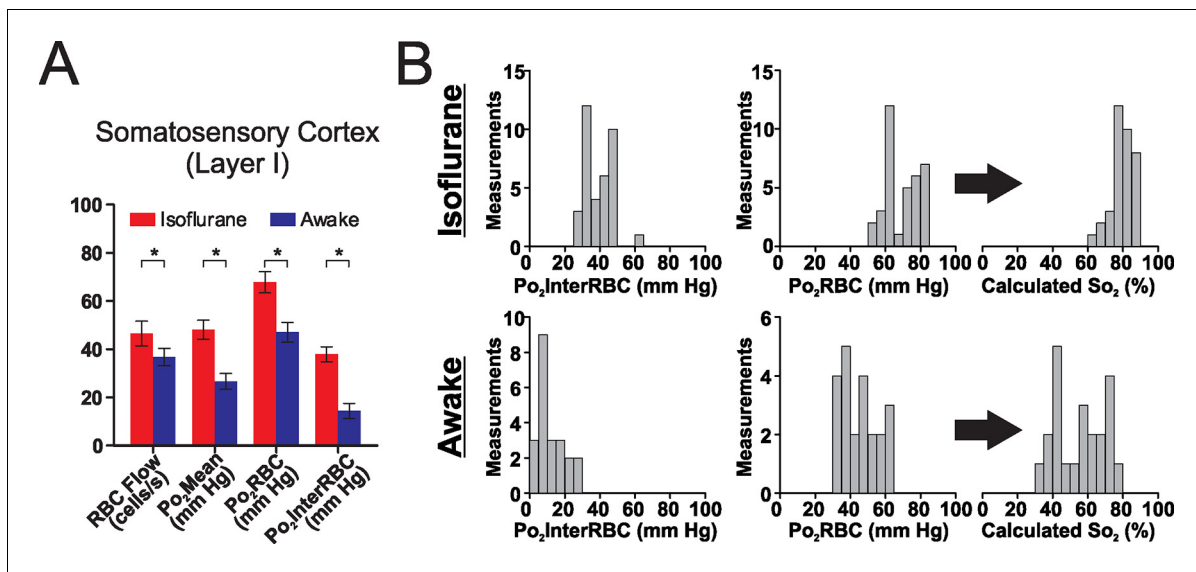

**Figure 3—figure supplement 1.** Isoflurane alters oxygenation in the somatosensory cortex. (A) As in the glomerular layer, isoflurane anesthesia (0.75% delivered in 21% O<sub>2</sub> air) increases Po<sub>2</sub> and RBC flow in layer I capillaries in the somatosensory cortex relative to the awake state. (B) This isoflurane-induced increase in Po<sub>2</sub> was associated in a right-shift in the frequency distribution of measured Po<sub>2</sub>Mean, Po<sub>2</sub>InterRBC and Po<sub>2</sub>RBC along with that of estimated So<sub>2</sub>. \*p<0.05, paired, 2-tailed, Wilcoxon signed rank test. n = 36 measurements under isoflurane and 22 in the awake state, from five capillaries.

DOI: [10.7554/eLife.12024.006](https://doi.org/10.7554/eLife.12024.006)

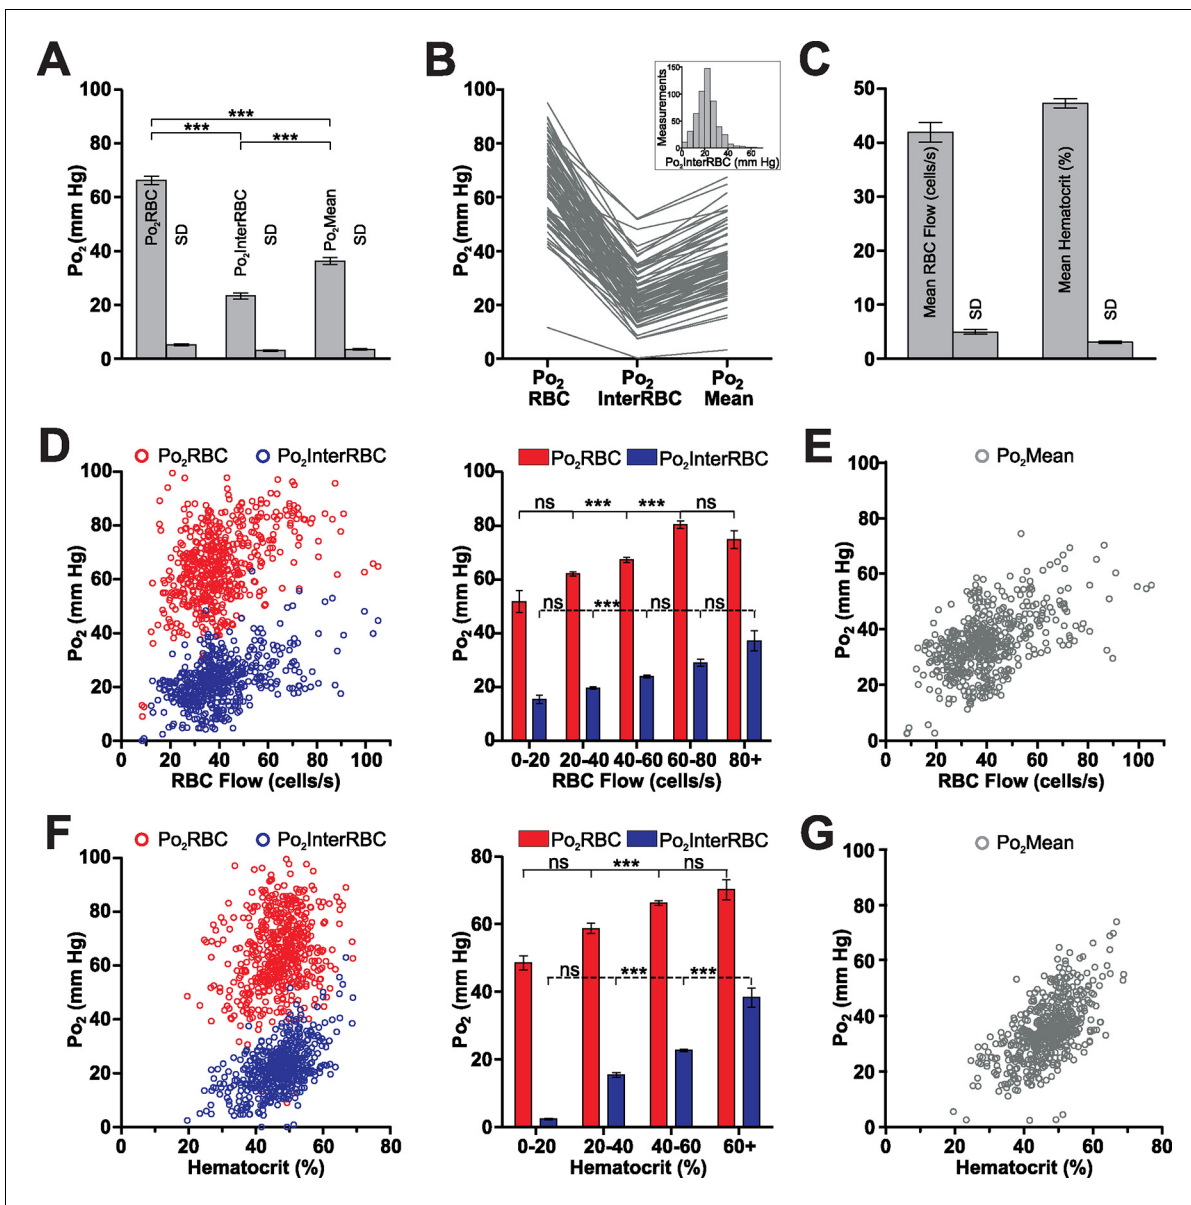

**Figure 4.** The relationship of  $Po_2$  to RBC flow and hematocrit in the somatosensory cortex of the awake mouse. (A) Average values and SD of  $Po_2$  parameters in somatosensory cortex capillaries, calculated from the mean values from each capillary (81 capillaries, 528 measurements, SD = the average of the SD values for each capillary, presented as mean standard deviation  $\pm$  SEM). (B) Distribution of all capillary  $Po_2$  values averaged in (A). Frequency distribution histogram of local tissue  $Po_2$  ( $Po_2$ InterRBC) in inset. 5 mm Hg bin. (C) Average values and SD of RBC flow and hematocrit calculated from the mean values from each capillary. (D) Distribution of all  $Po_2$ RBC and  $Po_2$ InterRBC measurements as a function of RBC flow. Note that for most values (from 20 to 60 cells/s), both  $Po_2$ InterRBC and  $Po_2$ RBC increase with RBC flow. (E)  $Po_2$ Mean as a function of RBC flow. (F) Distribution of all  $Po_2$ RBC and  $Po_2$ InterRBC measurements as a function of hematocrit. For most values (from 20 to 60%), both  $Po_2$ InterRBC and  $Po_2$ RBC increase with hematocrit. (G)  $Po_2$ Mean as a function of hematocrit. Bar graph data presented as Mean  $\pm$  SEM. \* $p$ <0.05, \*\* $p$ <0.01, \*\*\* $p$ <0.001. Kruskal-Wallis test with 2-tailed Dunn's multiple comparison post-hoc test.

DOI: 10.7554/eLife.12024.007

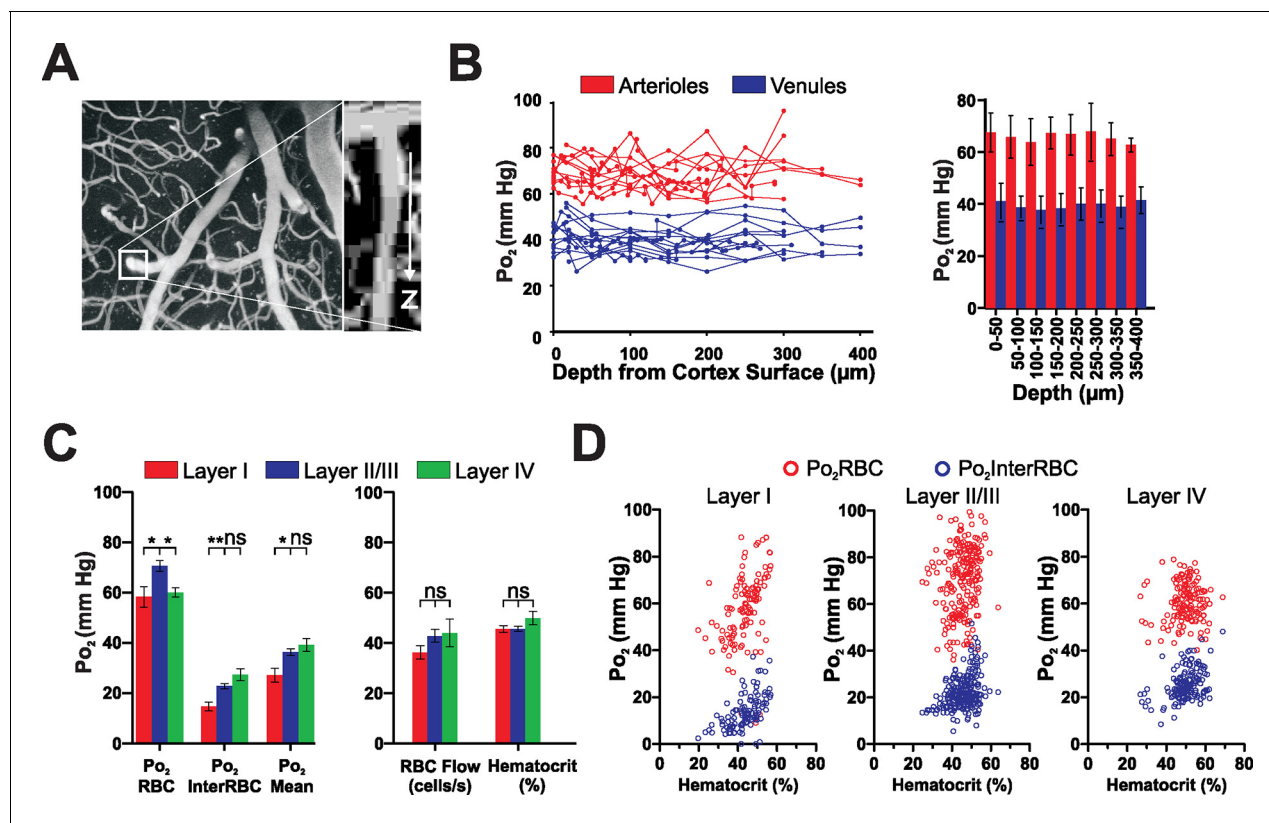

**Figure 5.** Depth profiles of vascular and local tissue oxygenation in the somatosensory cortex of the awake mouse. (A) Left panel, maximum intensity projection of superficial portion of the vasculature of the somatosensory cortex, with boxed area highlighting a penetrating arteriole shown in the XZ projection (right panel). (B) Left panel,  $Po_2$  values in penetrating arterioles (red) and venules (blue) as a function of depth from the cortical surface. Each line represents a single vessel. Right panel, mean of all  $Po_2$  values recorded from vessels as a function of depth. Note the absence of  $Po_2$  gradients with depth (50  $\mu\text{m}$  bin size, 136 measurements in 11 arterioles, 148 measurements in 14 venules, from 6 mice.) Data presented as mean  $\pm$  SD (C) Comparison of  $Po_2$  values (left panel), RBC flow and hematocrit (right panel) in layers I, II/III and IV. Note that capillary  $Po_2$ Mean and  $Po_2$ InterRBC are higher in layers II/III and IV than in layer I, although there are no significant differences in either blood flow parameter. Data presented as mean  $\pm$  SEM. \*  $p < 0.05$ , \*\* $p < 0.01$ , Kruskal-Wallis test with 2-tailed Dunn's multiple comparison post-hoc test.  $n$  = Layer I: 113 measurements in 17 capillaries, Layer II/III: 230 measurements in 41 capillaries, Layer IV: 151 measurements in 15 capillaries (D)  $Po_2$ RBC and  $Po_2$ InterRBC as a function of hematocrit in layers I, II/III and IV.

DOI: 10.7554/eLife.12024.008

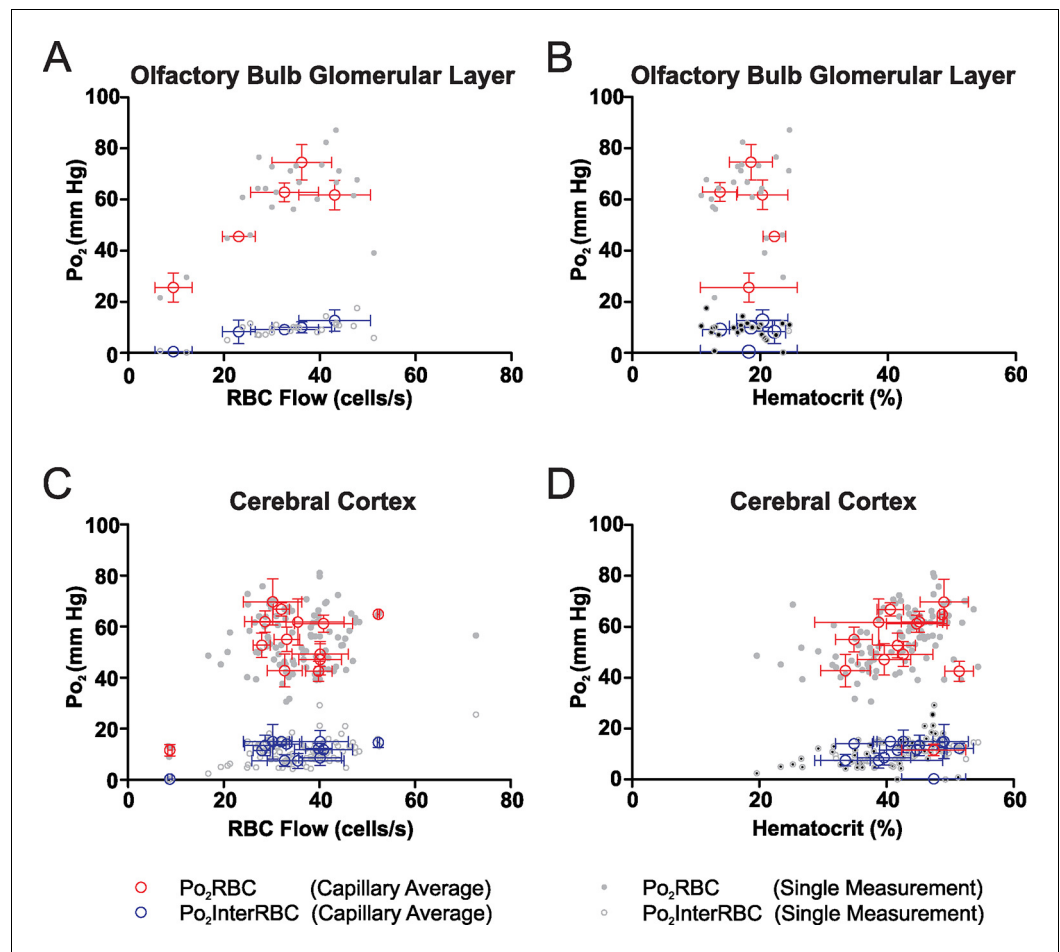

**Figure 6.** In the awake mouse, low interstitial  $Po_2$  in the olfactory bulb glomerular layer is associated with low hematocrit capillaries.  $Po_2$  values from all glomerular layer capillaries with average  $Po_2$ InterRBC values of <15 mm Hg ( $n = 24$  measurements in capillaries) are plotted as a function of RBC flow (A) and hematocrit (B). The RBC flow rates in these capillaries were distributed across a wide range, whereas in all cases capillary average hematocrit was <25%, suggesting that, in the glomerular layer, areas of low interstitial  $Po_2$  are supplied by capillaries with relatively low hematocrit values (hematocrit of these capillaries =  $18.6 \pm 1.4\%$ ,  $n = 5$ ; hematocrit of all other capillaries =  $37 \pm 1.7\%$ ,  $n = 33$ ;  $p = 0.002$ , unpaired t-test, mean  $\pm$  SEM). Conversely, cortical capillaries with average  $Po_2$ InterRBC <15 mm Hg ( $n = 13$  capillaries, 101 measurements) had wide ranges of both RBC flow (C) and hematocrit (D). However, the majority (10 of 13) of these capillaries were located in layer I. In all plots, single measurement values and mean  $\pm$  SD of all measurements in each capillary shown.

DOI: [10.7554/eLife.12024.009](https://doi.org/10.7554/eLife.12024.009)



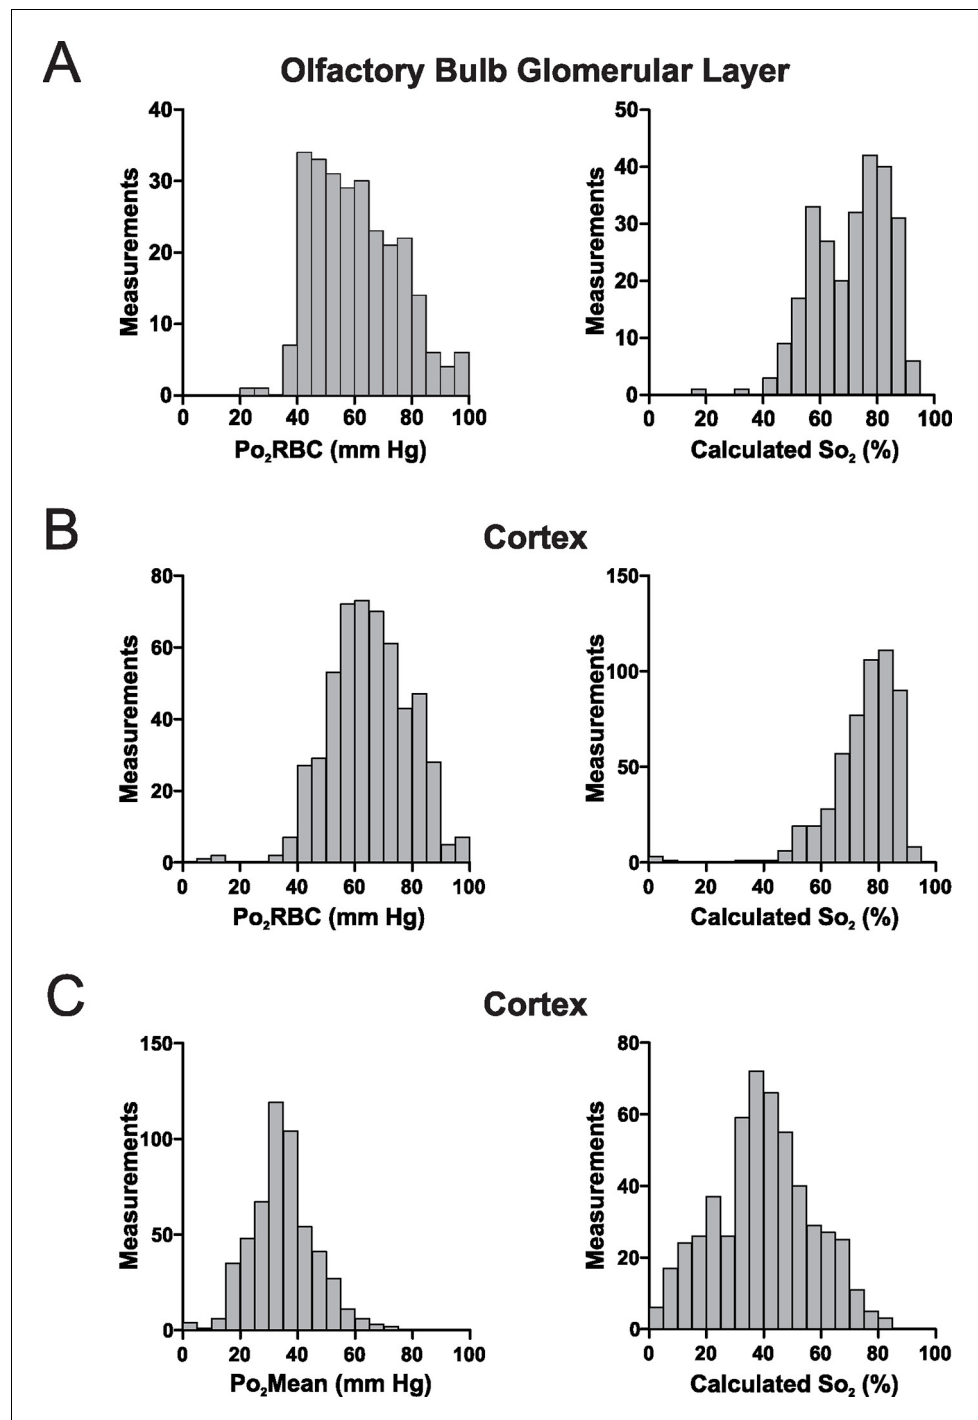

**Figure 7.** In the awake mouse, the majority of hemoglobin in cerebral capillaries is oxygenated. (A) Left panel, frequency distribution of Po<sub>2</sub>RBC values measured in the glomerular layer of awake mice, which were used to compute So<sub>2</sub> values (right panel). (B) Equivalent Po<sub>2</sub>RBC (left panel) and So<sub>2</sub> distributions (right panel) from the cerebral cortex. In both structures > 90% of the measurements have So<sub>2</sub> values of >50% (94.7% and 98.5% of measurements in the glomerular layer and the cortex respectively) with ~60% of So<sub>2</sub> values in the cortex being >75%. (C) Left panel, frequency distribution of Po<sub>2</sub>Mean values from cerebral cortex capillaries, with the So<sub>2</sub> distribution that would be computed were these lower Po<sub>2</sub> values considered to represent those present at the hemoglobin molecules in RBCs (right panel). Glomerular layer: n = 262 measurements in 38 capillaries. Somatosensory cortex: n = 528 measurements from 81 capillaries. Bin size 5 mm Hg and 5% for Po<sub>2</sub> and So<sub>2</sub> respectively.

DOI: [10.7554/eLife.12024.010](https://doi.org/10.7554/eLife.12024.010)
