# Supplementary figures and images for: Mapping oxygen concentration in the awake mouse brain
Source: eLife journal article supplement (doi:10.7554/elife.12024), 2016-02-02

Figure 3 - figure supplement 1

A

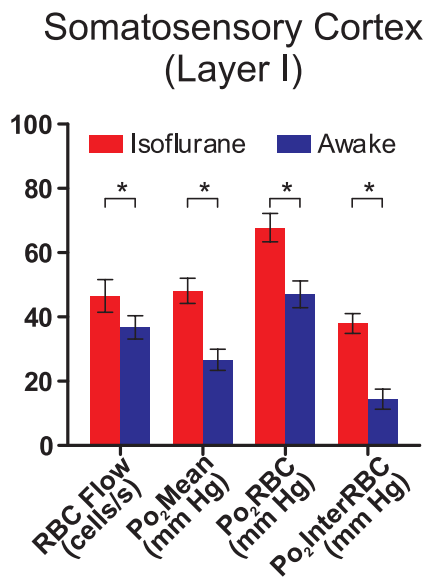

B

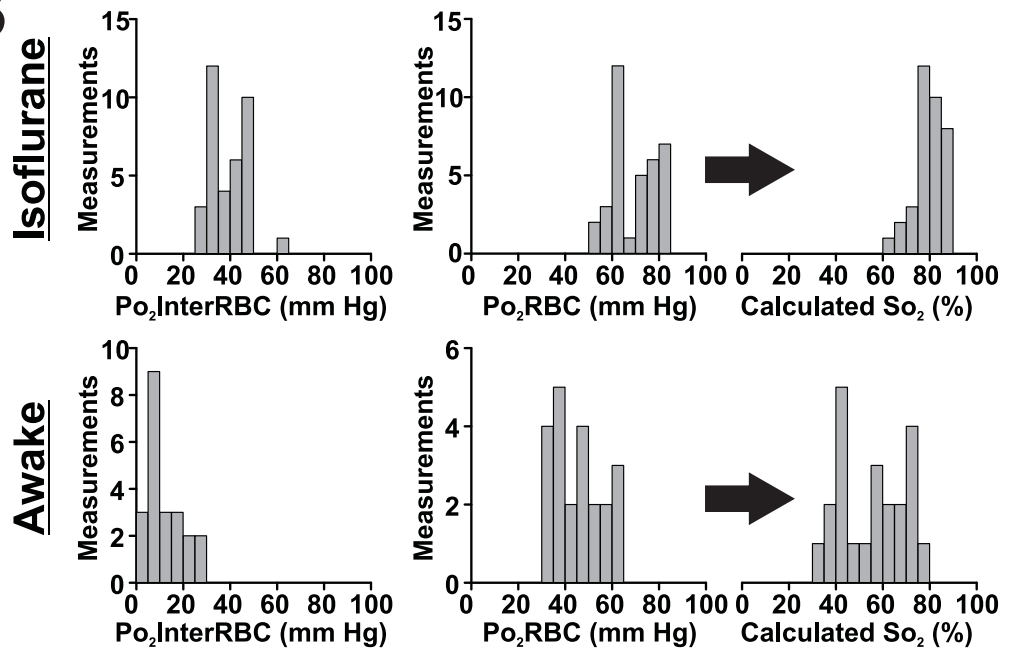

Supplement: supp [file elife-12024-supp-v1.zip]
